# Supplementary material for: Investigating the Intermediate Water Feature of Hydrated Titanium Containing Bioactive Glass
Source: MDPI journal article supplement (doi:10.3390/ijms22158038), 2021-07-27
Supplement: s1 [file s1]

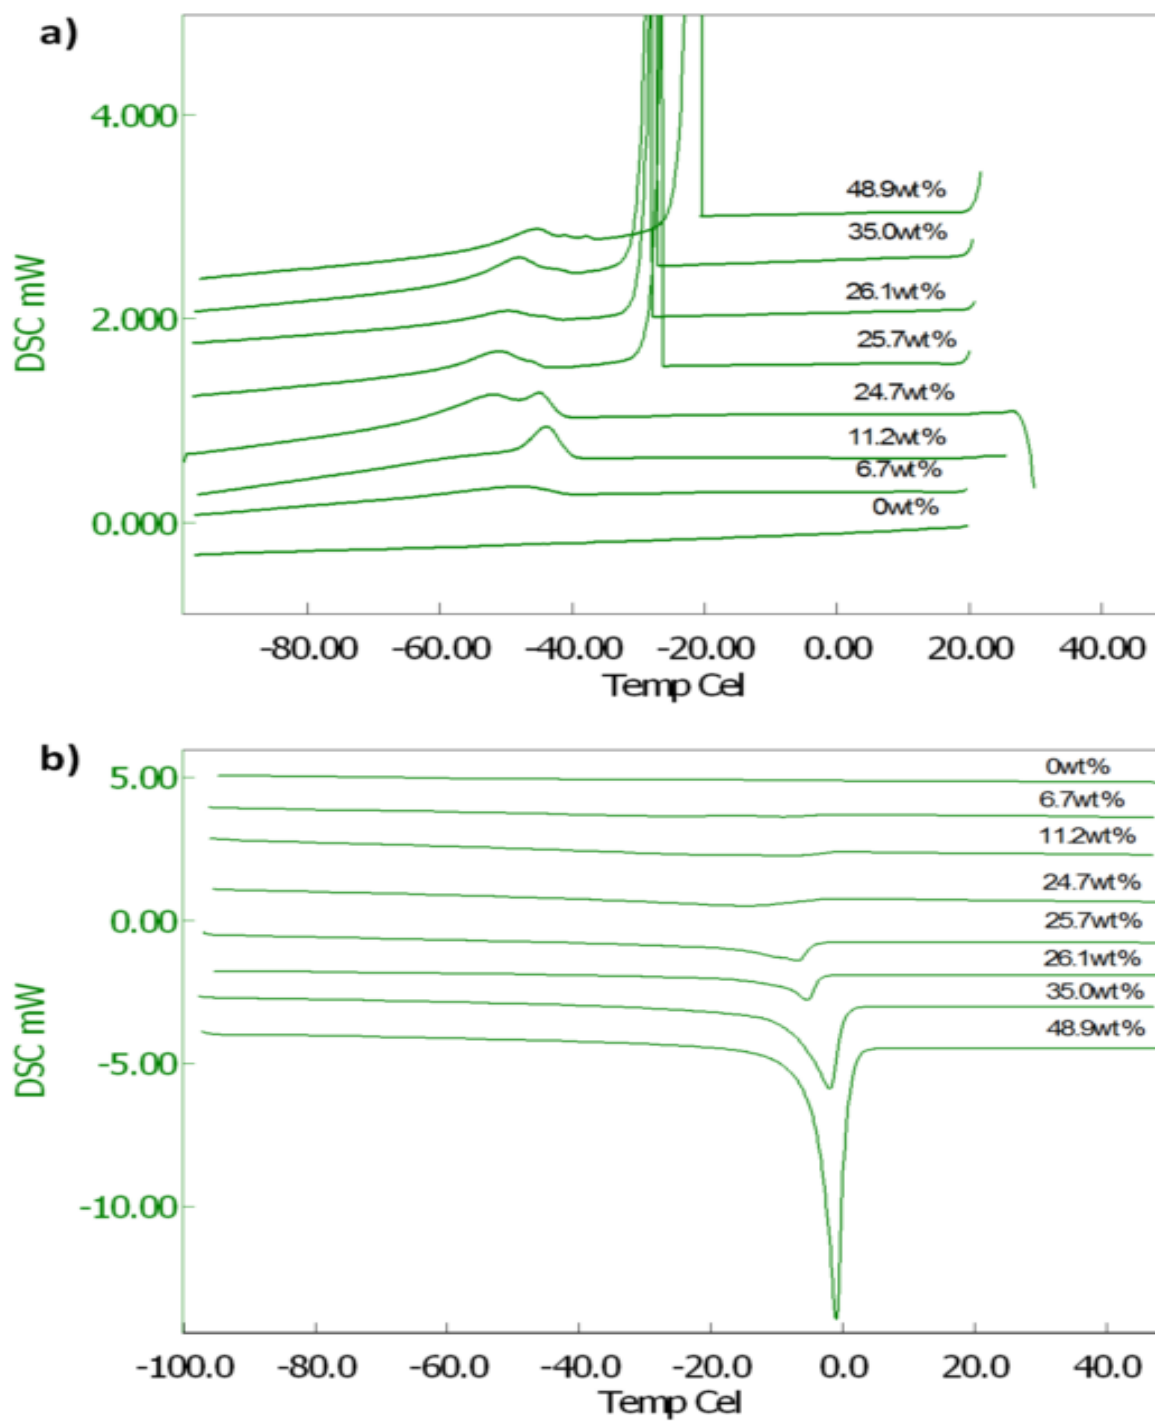

**Figure S1.** water content determined by DSC of BGT0 sample (a) cooling and (b) heating conditions; (c) water content of each type of water.

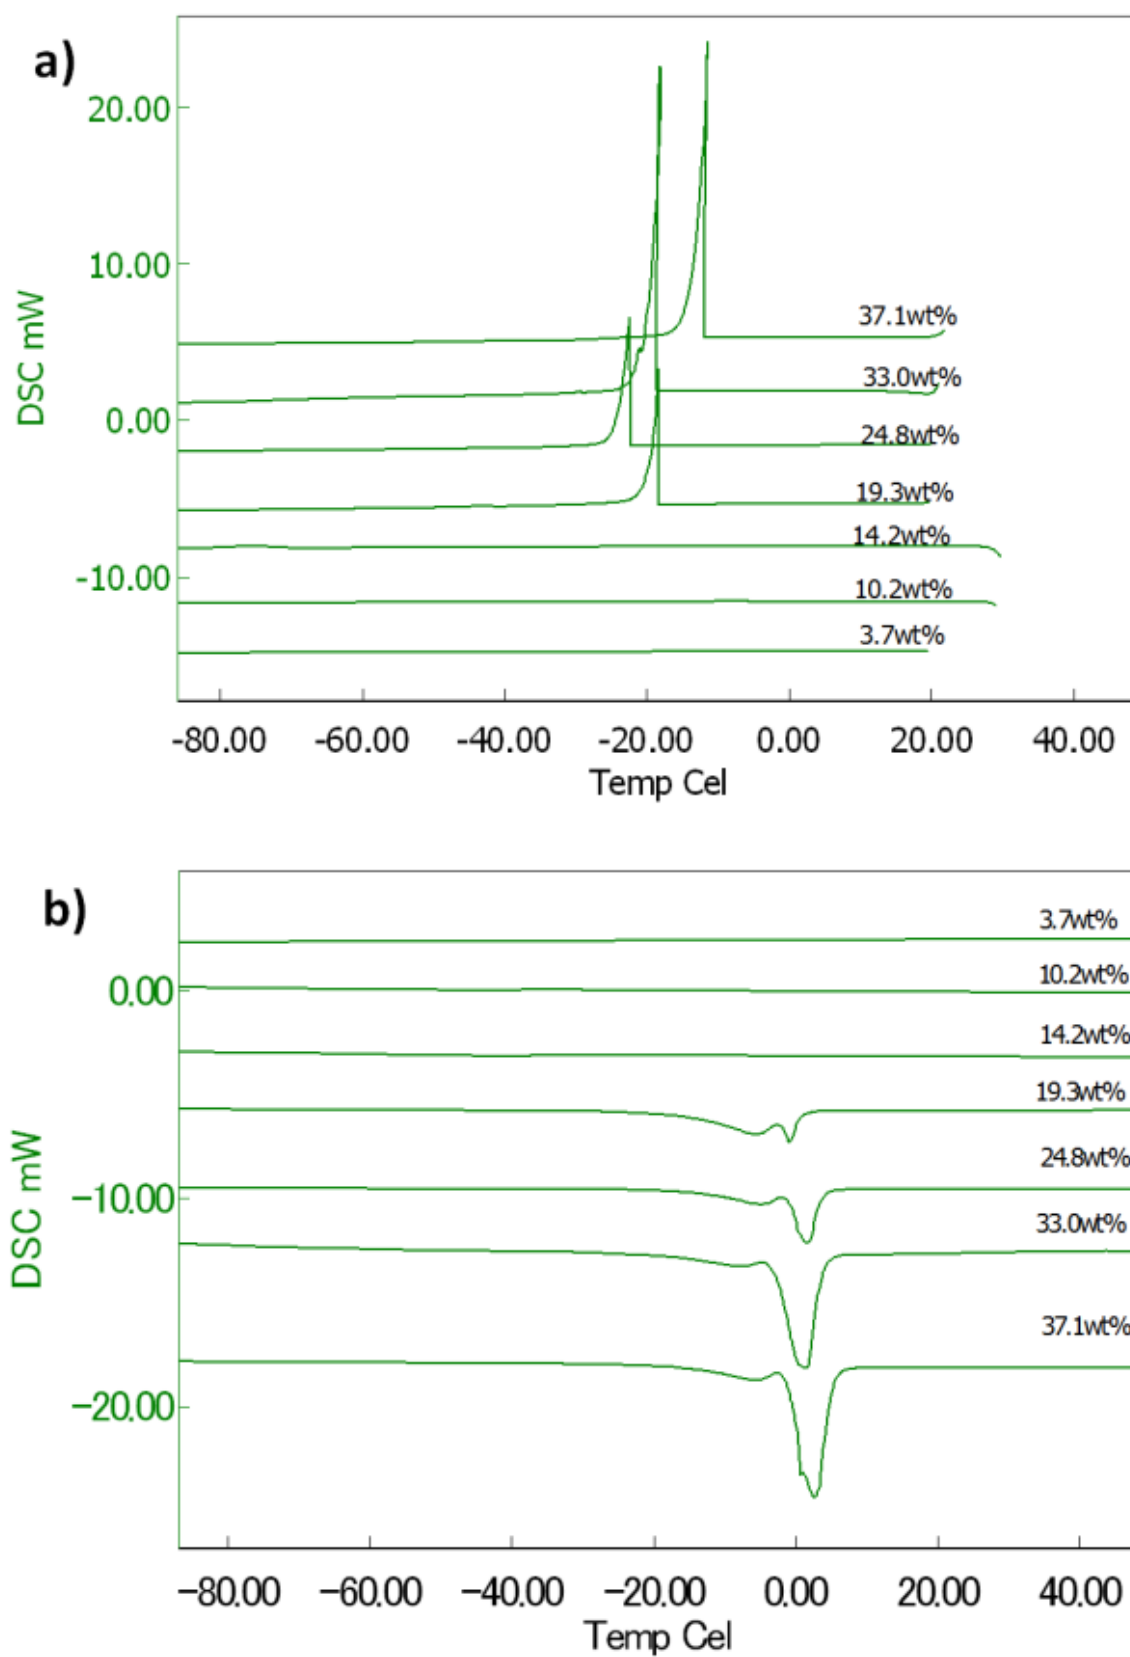

**Figure S2.** water content determined by DSC of BGT10 sample (a) cooling and (b) heating conditions; (c) water content of each type of water.
